# Supplementary material
Source: HighWire-hosted journal article supplement (https://oem.bmj.com/content/75/9/675)

Supplemental Figure 2. Funnel plot.

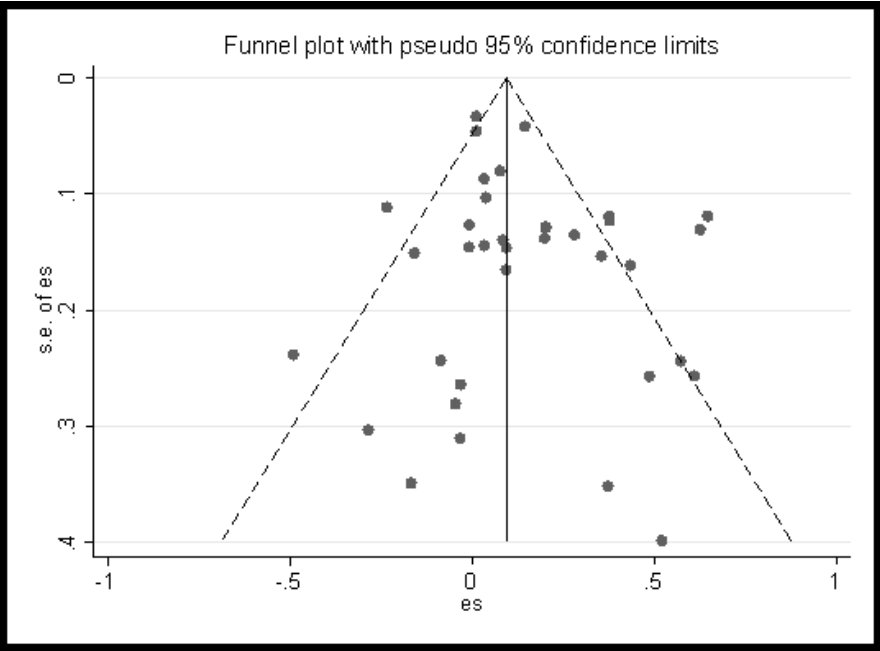

Supplement: inline-supplementary-material-5 [file inline-supplementary-material-5.pdf]
